# Supplementary material
Source: Springer Nature journal article supplement (https://www.springermedizin.de/resource/supplementary/12872_2014_732_MOESM2_ESM.pdf/9430776)

**A**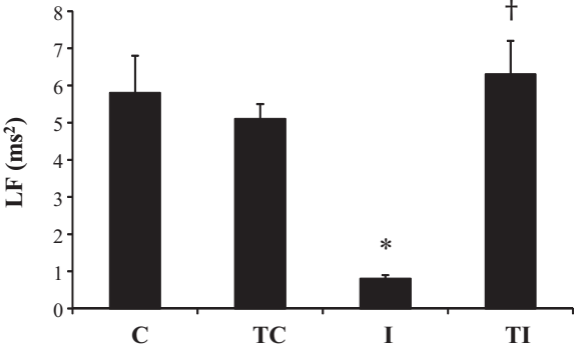**B**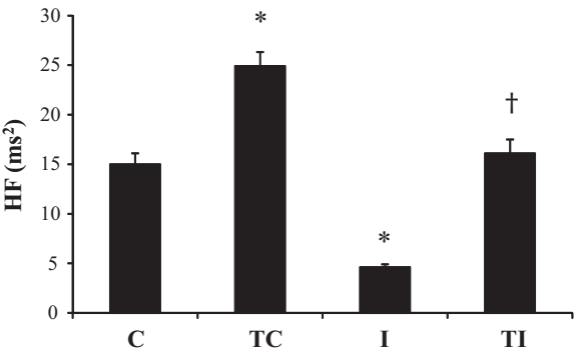

Supplement: MOESM2 [file 9430776]
